# Supplementary material
Source: publisher figshare collection journal article supplement (https://gsapubs.figshare.com/ndownloader/files/30991663)
Supplement: Supplementary file 1 [file 30991663]

## Sheet: Sheet1
Pluton	Sample №	Rb, ppm	Sr, ppm	87Rb/86Sr	±2σ	87Sr/86Sr	±2σ	(87Sr/86Sr)i	eSr(t)	Pluton	Sample №	Sm, ppm	Nd, ppm	147Sm/144Nd	±2σ	143Nd/144Nd	±2σ	(143Nd/144Nd)i	±2σ	eNd(t)	T(DM1)	T(DM2)
East Vorontsova Peninsula	118-11	87.0363	184.995	1.36132	0.000170915	0.708607	8.23456e-06	0.703765	-8.9846	East Vorontsova Peninsula	118-11	1.87906	8.32483	0.136462	1.86749e-05	0.5126	1.09158e-05	0.512377	1.09158e-05	1.18341	1.00818	0.969086
West Kamenny Island	112-3	234.131	1617.79	0.418688	9.39648e-05	0.707014	8.29558e-06	0.705614	17.1778	West Kamenny Island	112-3	6.57952	40.6766	0.0977902	1.16364e-05	0.512284	6.51985e-06	0.512134	6.51985e-06	-3.93349	1.08786	1.45668
Plavnikovye Islands	170-7	184.021	770.643	0.690817	0.000103343	0.706922	7.43896e-06	0.704613	2.96638	Plavnikovye Islands	170-7	2.31546	13.7949	0.101476	9.82422e-06	0.512441	1.43315e-05	0.512285	1.43315e-05	-0.981271	0.908251	1.16859
	171-1	110.57	881.243	0.362948	5.67759e-05	0.705839	2.0809e-05	0.704626	3.14628		171-1	3.94941	25.6906	0.092853	2.78559e-05	0.51247	2.56235e-05	0.512327	2.56235e-05	-0.161513	0.805968	1.0885
	173-1	126.656	822.385	0.44552	7.41615e-05	0.70616	1.61072e-05	0.704671	3.78058		173-1	3.37036	21.7458	0.0936134	2.8084e-05	0.512465	2.56235e-05	0.512321	2.56235e-05	-0.288711	0.818006	1.10093
Rastorguyev Island	194-2	255.513	2873.99	0.257203	5.51385e-05	0.706891	1.39703e-05	0.706068	23.5521	Rastorguyev Island	194-2	10.6144	65.0234	0.0985967	2.9579e-05	0.51221	2e-05	0.512065	2e-05	-5.53402	1.19511	1.60464
Astronomicheskiy Creek	G-2	86.44	1948	0.1282	5e-05	0.706321	6e-05	0.70587	24	Astronomicheskiy Creek	G-2	10.92	78.68	0.0839	0.00003	0.512099	2.2e-05	0.511963	0.00022	-6.9	1.24	1.61
TabS3
Kurapov, M., Ershova, V., Khudoley, A., Luchitskaya, M., Stockli, D., Makariev, A.,
Makarieva, E., and Vishnevskaya, I., 2021, Latest Permian–Triassic Magmatism of the
Taimyr Peninsula: New evidence for a connection to the Siberian Traps large igneous
province: Geosphere, v. 17, https://doi.org/10.1130/GES02421.1.
